# Supplementary material
Source: publisher site journal article supplement (https://www.dovepress.com/article/569692)
Supplement: Supplementary file 1 [file 569692_Supplementary%20Tables_2%20%25281%2529.docx]

**Supplementary Table S1.** Classical roles of the healthcare professionals in the transfusion process in China

| **Timing** | **Physician** | **Nurse** | **Transfusion service physician** |
| --- | --- | --- | --- |
| Before transfusion | Assessment: Based on the patient's condition and indications for blood products, determine the type and volume of blood products to be administered.  Informed consent: Explain to the patient and family the purpose, risks, and alternative treatments to transfusion, and obtain a signed "Blood Transfusion Consent Form."  Request: Complete a "Clinical Blood Request Form" and place the transfusion order. | Blood sampling: Draw blood specimens according to the physician's order and the completed blood request.  Delivery for testing: Send the request form and blood specimens to the transfusion service (blood bank).  Blood pickup: Collect the prescribed blood products and accompanying report forms from the transfusion service. | Receipt: Verify the request form and blood specimens and accept them.  Testing: Perform compatibility testing between the patient sample and donor blood prior to transfusion.  Issuance: After tests are qualified, verify the test report and blood product status, then release the blood products. |
| During transfusion | Monitoring: Observe the patient for clinical changes during transfusion.  Documentation: Record the patient's changes during transfusion in the medical record.  Treatment: If a transfusion adverse reaction occurs, manage it promptly, investigate the cause, and report to the transfusion service and the medical affairs department. | Education: Before transfusion begins, inform the patient and family about precautions during the transfusion.  Procedure: After confirming all information is correct, perform aseptic technique and start the transfusion.  Monitoring: Observe the patient’s vital signs and adjust infusion rate as needed during transfusion.  Documentation: Record vital signs such as heart rate and blood pressure in the nursing record.  Management: If an adverse transfusion reaction occurs, report to the physician immediately and follow medical orders for treatment. | Not specifically involved. |
| After transfusion | Evaluation: Assess the therapeutic effect of the transfused blood products.  Follow-up: Monitor the patient for any delayed transfusion adverse reactions.  Treatment: Treat any delayed transfusion reactions promptly.  Reporting: If an adverse reaction occurs, complete the relevant adverse reaction report form. | Return of blood bag: Return the post-transfusion blood bag to the transfusion service.  Follow-up: Monitor the patient for delayed transfusion adverse reactions and changes in vital signs.  Management: Manage delayed transfusion reactions according to physician orders.  Reporting: If an adverse reaction occurs, complete the relevant adverse reaction report form. | Retention: Keep the tested patient specimen and the donor specimen for at least 7 days; retain the returned blood bag for 24 hours.  Evaluation: Compile and analyze physicians' efficacy assessments.  Investigation and reporting: If a transfusion adverse reaction occurs, perform testing and investigate the cause.  Oversight: Analyze physicians' adherence to transfusion indications and review the completeness of medical and nursing records. |

**Supplementary Table** **S2.** Understanding pathways for adverse transfusion reactions

|  | **Nurses (n=327)** | **Transfusion department staff (n=219)** | **Physicians (n=253)** | **Overall (n=799)** |
| --- | --- | --- | --- | --- |
| **Books** | |  |  |  |
| No | 17 (5.20) | 18 (8.22) | 33 (13.04) | 68 (8.51) |
| Yes | 310 (94.80) | 201 (91.78) | 220 (86.96) | 731 (91.49) |
| **Online resources** | |  |  |  |
| No | 104 (31.80) | 68 (31.05) | 106 (41.90) | 278 (34.79) |
| Yes | 223 (68.20) | 151 (68.95) | 147 (58.10) | 521 (65.21) |
| **Lectures** | |  |  |  |
| No | 68 (20.80) | 43 (19.63) | 101 (39.92) | 212 (26.53) |
| Yes | 259 (79.20) | 176 (80.37) | 152 (60.08) | 587 (73.47) |
| **Classroom training** | |  |  |  |
| No | 84 (25.69) | 70 (31.96) | 96 (37.94) | 250 (31.29) |
| Yes | 243 (74.31) | 149 (68.04) | 157 (62.06) | 549 (68.71) |
| **Other** | |  |  |  |
| No | 287 (87.77) | 174 (79.45) | 215 (84.98) | 676 (84.61) |
| Yes | 40 (12.23) | 45 (20.55) | 38 (15.02) | 123 (15.39) |

**Supplementary Table S3.** Characteristics and KAP score of the nurses

|  | **n (%)** | **Knowledge** | | **Attitude** | | **Practice** | |
| --- | --- | --- | --- | --- | --- | --- | --- |
| **Score** | **P** | **Score** | **P** | **Score** | **P** |
| **Total** | 327 (100) | 11.89±1.41 |  | 51.39±4.21 |  | 49.22±2.79 |  |
| **Gender** |  |  | 0.828 |  | 0.899 |  | 0.870 |
| Male | 15 (4.59) | 12.07±1.28 |  | 52.00±3.55 |  | 48.73±3.35 |  |
| Female | 312 (95.41) | 11.88±1.42 |  | 51.36±4.24 |  | 49.24±2.76 |  |
| **Age** | 33.54±7.12 |  |  |  |  |  |  |
| **Education** |  |  | 0.767 |  | 0.378 |  | 0.346 |
| Bachelor’s degree and below | 316 (96.64) | 11.88±1.43 |  | 51.33±4.26 |  | 49.22±2.78 |  |
| Master’s degree and above | 11 (3.36) | 12.09±0.70 |  | 53.00±1.41 |  | 49.00±3.00 |  |
| **Monthly average family income (RMB)** |  |  | 0.619 |  | 0.816 |  | 0.669 |
| <5000 | 65 (19.88) | 12.06±1.22 |  | 51.35±3.79 |  | 49.17±2.57 |  |
| 5000-10,000 | 198 (60.55) | 11.85±1.36 |  | 51.58±4.07 |  | 49.17±2.99 |  |
| 10,000-20,000 | 56 (17.13) | 11.89±1.72 |  | 51.11±4.46 |  | 49.32±2.51 |  |
| ≥20,000 | 8 (2.45) | 11.25±1.75 |  | 48.88±7.83 |  | 50.00±0 |  |
| **Marital status** |  |  | 0.301 |  | 0.292 |  | <0.001 |
| Other | 108 (33.03) | 11.97±1.52 |  | 50.63±5.22 |  | 48.34±4.02 |  |
| Married | 219 (66.97) | 11.84±1.36 |  | 51.76±3.56 |  | 49.65±1.76 |  |
| **Department** |  |  | 0.564 |  | 0.497 |  | 0.555 |
| Internal Medicine | 129 (39.45) | 11.96±1.52 |  | 51.66±4.18 |  | 49.22±3.12 |  |
| Surgery | 99 (30.28) | 11.83±1.35 |  | 51.29±3.87 |  | 49.04±2.85 |  |
| Other Departments | 99 (30.28) | 11.85±1.33 |  | 51.13±4.57 |  | 49.38±2.21 |  |
| **Professional title** |  |  | 0.105 |  | 0.026 |  | <0.001 |
| Medical student | 11 (3.36) | 10.91±2.59 |  | 47.73±5.68 |  | 45.00±5.53 |  |
| Junior | 104 (31.80) | 11.90±1.41 |  | 50.67±5.10 |  | 48.54±3.86 |  |
| Intermediate | 190 (58.10) | 11.86±1.32 |  | 51.87±3.57 |  | 49.74±1.42 |  |
| Senior | 22 (6.73) | 12.50±1.14 |  | 52.45±2.11 |  | 50.00±0 |  |
| **Years of work** |  |  | 0.088 |  | 0.127 |  | <0.001 |
| 1-3 years | 60 (18.35) | 12.07±1.64 |  | 50.32±5.59 |  | 47.98±4.46 |  |
| 4-6 years | 45 (13.76) | 12.24±1.13 |  | 50.36±4.56 |  | 48.76±3.54 |  |
| 7-10 years | 63 (19.27) | 11.67±1.58 |  | 51.94±3.76 |  | 49.68±1.68 |  |
| >10 years | 159 (48.62) | 11.81±1.31 |  | 51.87±3.53 |  | 49.63±1.76 |  |
| **Hospital level** |  |  | 0.102 |  | 0.352 |  | 0.343 |
| Provincial and ministerial level | 293 (89.60) | 11.95±1.35 |  | 51.40±4.25 |  | 49.20±2.79 |  |
| Municipal level | 16 (4.89) | 11.25±2.24 |  | 50.44±4.47 |  | 48.56±4.03 |  |
| County-level and below | 18 (5.50) | 11.39±1.29 |  | 52.00±3.29 |  | 50.00±0 |  |
| **Blood transfusion operations at work** |  |  | 0.575 |  | 0.524 |  | 0.011 |
| Yes | 313 (95.72) | 11.91±1.34 |  | 51.46±4.10 |  | 49.30±2.64 |  |
| No | 14 (4.28) | 11.29±2.59 |  | 49.71±6.08 |  | 47.43±4.86 |  |
| **Adverse transfusion reactions** **encountered in work** |  |  | 0.188 |  | 0.559 |  | 0.714 |
| Yes | 250 (76.45) | 11.95±1.35 |  | 51.39±4.09 |  | 49.26±2.73 |  |
| No | 77 (23.55) | 11.68±1.58 |  | 51.38±4.62 |  | 49.06±2.97 |  |
| **Understanding of adverse transfusion reactions** | 8.43±1.73 |  |  |  |  |  |  |

The possible ranges for knowledge, attitude, and practice scores were 0-14, 11-55, and 10-50, respectively. Continuous variables are expressed as means ± standard deviations. Categorical variables are expressed as n (%).

**Supplementary Table S4.** Practice dimension of nurses

|  | Very consistent | Consistent | Neutral | Inconsistent | Very inconsistent |
| --- | --- | --- | --- | --- | --- |
| Pn1. I will collect and submit specimens for transfusion testing as required. | 302 (92.35) | 22 (6.73) | 3 (0.92) | 0 | 0 |
| Pn2. During blood collection and before transfusion, I will examine the blood, including blood type, blood components, labeling, quantity, expiration date, time, appearance, and laboratory results. | 304 (92.97) | 20 (6.12) | 3 (0.92) | 0 | 0 |
| Pn3. Before transfusion, I will provide education to patients or their families on transfusion speed, precautions for transfusion reaction symptoms, etc. | 301 (92.05) | 23 (7.03) | 3 (0.92) | 0 | 0 |
| Pn4. I will strictly adhere to aseptic procedures during blood transfusion, follow the principle of slow to fast infusion speed, and complete the transfusion within the required time. | 305 (93.27) | 19 (5.81) | 3 (0.92) | 0 | 0 |
| Pn5. I will maintain active communication with doctors and the transfusion department during blood transfusion to ensure accurate monitoring of patient vital signs and information. | 305 (93.27) | 20 (6.12) | 2 (0.61) | 0 | 0 |
| Pn6. I will closely monitor patients during transfusion to promptly detect symptoms and signs of adverse transfusion reactions. | 307 (93.88) | 19 (5.81) | 1 (0.31) | 0 | 0 |
| Pn7. I will adhere to hospital requirements for proper nursing record-keeping during blood transfusion. | 307 (93.88) | 18 (5.50) | 2 (0.61) | 0 | 0 |
| Pn8. I will conduct post-transfusion efficacy assessments, recording changes in vital signs and post-transfusion observations. | 303 (92.66) | 22 (6.73) | 2 (0.61) | 0 | 0 |
| Pn9. In the event of a patient experiencing a transfusion reaction, I will promptly identify and manage it, complete a transfusion reaction report, and submit it to the transfusion department or blood bank. | 303 (92.66) | 21 (6.42) | 3 (0.92) | 0 | 0 |
| Pn10. I consistently update my professional knowledge and skills related to blood transfusion therapy. | 301 (92.05) | 24 (7.34) | 2 (0.61) | 0 | 0 |

**Supplementary Table S5.** Characteristics of non-transfusion specialist physicians

|  | **n (%)** | **Knowledge** | | **Attitude** | | **Practice** | |
| --- | --- | --- | --- | --- | --- | --- | --- |
| **Score** | **P** | **Score** | **P** | **Score** | **P** |
| **Total** | 253 (100) | 11.67±2.17 |  | 49.49±5.35 |  | 47.60±5.09 |  |
| **Gender** |  |  | 0.194 |  | 0.866 |  | 0.749 |
| Male | 119 (47.04) | 11.50±2.22 |  | 49.47±5.48 |  | 47.31±5.16 |  |
| Female | 134 (52.96) | 11.82±2.12 |  | 49.51±5.25 |  | 47.86±5.03 |  |
| **Age** | 35.45±8.629 |  |  |  |  |  |  |
| **Education** |  |  | <0.001 |  | 0.361 |  | 0.409 |
| Bachelor’s degree and below | 84 (33.20) | 10.93±2.66 |  | 49.00±5.96 |  | 47.43±5.93 |  |
| Master’s degree and above | 169 (66.80) | 12.04±1.77 |  | 49.73±5.02 |  | 47.69±4.63 |  |
| **Monthly average family income (RMB)** |  |  | 0.161 |  | 0.552 |  | 0.507 |
| <5000 | 74 (29.25) | 11.31±2.31 |  | 49.55±6.07 |  | 47.69±5.95 |  |
| 5000-10,000 | 110 (43.48) | 11.86±1.74 |  | 49.09±5.28 |  | 47.27±5.08 |  |
| 10,000-20,000 | 58 (22.92) | 11.83±2.57 |  | 49.88±4.92 |  | 47.98±4.10 |  |
| ≥20,000 | 11 (4.35) | 11.36±2.69 |  | 51.00±2.45 |  | 48.27±3.85 |  |
| **Marital status** |  |  | 0.483 |  | 0.538 |  | <0.001 |
| Other | 87 (34.39) | 11.52±2.66 |  | 48.99±5.97 |  | 46.00±6.28 |  |
| Married | 166 (65.61) | 11.75±1.86 |  | 49.75±4.99 |  | 48.44±4.12 |  |
| **Department** |  |  | 0.272 |  | 0.535 |  | 0.944 |
| Internal Medicine | 71 (28.06) | 11.97±1.83 |  | 49.31±4.92 |  | 47.55±4.85 |  |
| Surgery | 80 (31.62) | 11.85±1.65 |  | 49.49±5.70 |  | 47.44±5.19 |  |
| Other Departments | 102 (40.32) | 11.32±2.66 |  | 49.62±5.40 |  | 47.76±5.21 |  |
| **Professional title** |  |  | 0.002 |  | 0.007 |  | <0.001 |
| Medical student | 46 (18.18) | 11.00±2.75 |  | 47.17±6.95 |  | 44.33±7.41 |  |
| Junior | 40 (15.81) | 11.65±2.52 |  | 51.38±3.62 |  | 48.38±3.56 |  |
| Intermediate | 70 (27.67) | 12.27±1.91 |  | 49.86±5.05 |  | 47.96±4.73 |  |
| Senior | 97 (38.34) | 11.57±1.76 |  | 49.55±4.96 |  | 48.58±3.82 |  |
| **Years of work** |  |  | 0.062 |  | 0.481 |  | 0.046 |
| 1-3 years | 80 (31.62) | 11.63±2.25 |  | 49.50±5.66 |  | 46.70±5.91 |  |
| 4-6 years | 33 (13.04) | 11.52±3.10 |  | 50.45±4.68 |  | 47.24±4.47 |  |
| 7-10 years | 38 (15.02) | 12.13±2.18 |  | 49.08±5.40 |  | 48.13±4.88 |  |
| >10 years | 102 (40.32) | 11.59±1.69 |  | 49.32±5.33 |  | 48.23±4.59 |  |
| **Hospital level** |  |  | 0.006 |  | 0.443 |  | 0.288 |
| Provincial and ministerial level | 140 (55.34) | 12.06±1.80 |  | 49.66±5.46 |  | 47.24±5.38 |  |
| Municipal level | 57 (22.53) | 11.09±2.70 |  | 49.58±5.23 |  | 47.95±5.03 |  |
| County-level and below | 56 (22.13) | 11.29±2.24 |  | 48.98±5.27 |  | 48.14±4.36 |  |
| **Blood transfusion operations at work** |  |  | 0.076 |  | 0.906 |  | 0.519 |
| Yes | 204 (80.63) | 11.89±1.72 |  | 49.56±5.09 |  | 47.87±4.55 |  |
| No | 49 (19.37) | 10.76±3.33 |  | 49.18±6.37 |  | 46.49±6.83 |  |
| **Adverse transfusion reactions encountered in work** |  |  | 0.096 |  | 0.303 |  | 0.721 |
| Yes | 143 (56.52) | 11.99±1.59 |  | 49.36±5.03 |  | 47.83±4.38 |  |
| No | 110 (43.48) | 11.25±2.69 |  | 49.66±5.75 |  | 47.30±5.89 |  |
| **Understanding of adverse transfusion reactions** | 6.94±2.02 |  |  |  |  |  |  |

The possible ranges for knowledge, attitude, and practice scores were 0-14, 11-55, and 10-50, respectively. Continuous variables are expressed as means ± standard deviations. Categorical variables are expressed as n (%).

**Supplementary Table S6.** Practice dimension of non-transfusion specialist physicians

|  | Very consistent | Consistent | Neutral | Inconsistent | Very inconsistent |
| --- | --- | --- | --- | --- | --- |
| Pnts1. Before administering blood to patients, I conduct a comprehensive assessment based on the patient’s clinical presentation, medical history, blood loss, compensatory functions, laboratory results, and patient preferences. | 208 (82.21) | 35 (13.83) | 9 (3.56) | 1 (0.40) | 0 |
| Pnts2. I provide clear information to patients or their families before transfusion, explaining the purpose, method, risks, and alternative treatment options. | 202 (79.84) | 35 (13.83) | 13 (5.14) | 1 (0.40) | 2 (0.79) |
| Pnts3. During a blood transfusion, I adhere to the principles of irreplaceability, minimal dosage, and individualized infusion. In emergency rescue transfusions, I prioritize the principle of the right to life. | 203 (80.24) | 36 (14.23) | 11 (4.35) | 1 (0.40) | 2 (0.79) |
| Pnts4. I gather detailed patient histories before transfusion, including underlying diseases, transfusion history, allergy history, pregnancy history, etc. | 210 (83.00) | 32 (12.65) | 10 (3.95) | 1 (0.40) | 0 |
| Pnts5. I maintain active communication with nurses and the transfusion department during blood transfusion to ensure accurate monitoring of patient vital signs and information. | 208 (82.21) | 34 (13.44) | 9 (3.56) | 1 (0.40) | 1 (0.40) |
| Pnts6. I closely monitor patients during transfusion to promptly detect symptoms and signs of adverse transfusion reactions. | 210 (83.00) | 34 (13.44) | 8 (3.16) | 1 (0.40) | 0 |
| Pnts7. I adhere to hospital requirements for proper blood transfusion record-keeping. | 211 (83.40) | 29 (11.46) | 11 (4.35) | 1 (0.40) | 1 (0.40) |
| Pnts8. I conduct post-transfusion efficacy assessments, recording changes in vital signs and post-transfusion observations. | 208 (82.21) | 32 (12.65) | 11 (4.35) | 1 (0.40) | 1 (0.40) |
| Pnts9. In the event of a patient experiencing a transfusion reaction, I promptly identify and manage it, complete a transfusion reaction report, and submit it to the transfusion department or blood bank. | 205 (81.03) | 35 (13.83) | 12 (4.74) | 1 (0.40) | 0 |
| Pnts10. I consistently update my professional knowledge and skills related to blood transfusion therapy. | 205 (81.03) | 36 (14.23) | 10 (3.95) | 2 (0.79) | 0 |

**Supplementary Table S7.** Characteristics of transfusion specialist physicians

|  | **n (%)** | **Knowledge** | | **Attitude** | | **Practice** | |
| --- | --- | --- | --- | --- | --- | --- | --- |
| **Score** | **P** | **Score** | **P** | **Score** | **P** |
| **Total** | 219 (100%) | 11.75±1.79 |  | 50.07±4.47 |  | 44.35±14.13 |  |
| **Gender** |  |  | 0.595 |  | 0.199 |  | 0.972 |
| Male | 67 (30.59) | 11.39±2.31 |  | 49.19±5.46 |  | 43.24±15.62 |  |
| Female | 152 (69.41) | 11.91±1.48 |  | 50.46±3.92 |  | 44.84±13.45 |  |
| **Age** | 38.78±8.47 |  |  |  |  |  |  |
| **Education** |  |  | 0.455 |  | 0.448 |  | 0.773 |
| Bachelor’s degree and below | 161 (73.52) | 11.70±1.82 |  | 50.22±4.17 |  | 44.29±14.42 |  |
| Master’s degree and above | 58 (26.48) | 11.90±1.70 |  | 49.66±5.23 |  | 44.52±13.44 |  |
| **Monthly average family income (RMB)** |  |  | 0.671 |  | 0.968 |  | 0.331 |
| <5000 | 46 (21.00) | 11.26±2.65 |  | 49.89±4.77 |  | 40.15±18.78 |  |
| 5000-10,000 | 105 (47.95) | 11.94±1.51 |  | 49.89±4.88 |  | 44.45±14.31 |  |
| 10,000-20,000 | 59 (26.94) | 11.76±1.38 |  | 50.49±3.63 |  | 47.64±6.88 |  |
| ≥20,000 | 9 (4.11) | 12.00±1.41 |  | 50.44±3.05 |  | 43.11±16.50 |  |
| **Marital status** |  |  | 0.007 |  | 0.344 |  | 0.003 |
| Other | 37 (16.89) | 10.76±2.63 |  | 49.62±6.79 |  | 38.43±19.71 |  |
| Married | 182 (83.11) | 11.96±1.49 |  | 50.16±3.86 |  | 45.55±12.44 |  |
| **Professional title** |  |  | <0.001 |  | 0.639 |  | 0.005 |
| Medical student | 10 (4.57) | 8.700±3.09 |  | 48.10±7.02 |  | 25.00±26.35 |  |
| Junior | 36 (16.44) | 11.11±2.28 |  | 49.03±5.68 |  | 40.39±18.43 |  |
| Intermediate | 96 (43.84) | 11.94±1.42 |  | 50.56±4.37 |  | 45.22±12.61 |  |
| Senior | 77 (35.16) | 12.22±1.19 |  | 50.21±3.39 |  | 47.64±8.18 |  |
| **Years of work** |  |  | 0.006 |  | 0.859 |  | 0.003 |
| 1-3 years | 21 (9.59) | 10.71±2.53 |  | 47.10±9.15 |  | 37.43±20.07 |  |
| 4-6 years | 30 (13.70) | 10.73±2.66 |  | 50.33±4.23 |  | 37.27±21.04 |  |
| 7-10 years | 40 (18.26) | 12.03±1.69 |  | 50.25±3.48 |  | 44.05±15.07 |  |
| >10 years | 128 (58.45) | 12.08±1.19 |  | 50.45±3.42 |  | 47.24±8.97 |  |
| **Hospital level** |  |  | 0.111 |  | 0.359 |  | 0.599 |
| Provincial and ministerial level | 64 (29.22) | 11.44±1.82 |  | 49.94±5.02 |  | 44.36±14.03 |  |
| Municipal level | 88 (40.18) | 11.86±1.78 |  | 49.53±4.72 |  | 43.65±15.04 |  |
| County-level and below | 67 (30.59) | 11.91±1.76 |  | 50.91±3.39 |  | 45.27±13.12 |  |
| **Blood transfusion operations at work** |  |  | 0.160 |  | 0.371 |  | 0.110 |
| Yes | 182 (83.11) | 11.84±1.72 |  | 50.07±4.39 |  | 43.72±14.93 |  |
| No | 37 (16.89) | 11.35±2.04 |  | 50.11±4.93 |  | 47.46±8.74 |  |
| **Adverse transfusion reactions encountered in work** |  |  | 0.184 |  | 0.343 |  | 0.759 |
| Yes | 185 (84.47) | 11.89±1.57 |  | 50.18±3.84 |  | 44.95±13.19 |  |
| No | 34 (15.53) | 11.03±2.60 |  | 49.50±7.04 |  | 41.09±18.36 |  |
| **Understanding of adverse transfusion reactions** | 6.71±1.93 |  |  |  |  |  |  |

The possible ranges for knowledge, attitude, and practice scores were 0-14, 11-55, and 10-50, respectively. Continuous variables are expressed as means ± standard deviations. Categorical variables are expressed as n (%).

**Supplementary Table S8.** Practice dimension of transfusion specialist physicians

|  | Very consistent | Consistent | Neutral | Inconsistent | Very inconsistent |
| --- | --- | --- | --- | --- | --- |
| Pts1. I will strictly adhere to blood product storage requirements. | 186 (93.00) | 9 (4.50) | 4 (2.00) | 0 | 1 (0.50) |
| Pts2. Before testing, I will review patient histories (transfusion history, allergy history, medication history) as well as vital signs and testing indicators. | 167 (83.50) | 24 (12.00) | 7 (3.50) | 1 (0.50) | 1 (0.50) |
| Pts3. I will complete pre-transfusion patient and donor immunohematological testing according to technical specifications. | 187 (93.50) | 11 (5.50) | 1 (0.50) | 0 | 1 (0.50) |
| Pts4. When issuing blood products, I will perform quality checks and verify information. | 186 (93.00) | 12 (6.00) | 1 (0.50) | 1 (0.50) | 0 |
| Pts5. I will maintain active communication with clinical doctors and nurses during blood transfusions to ensure accurate information. | 184 (92.00) | 14 (7.00) | 1 (0.50) | 1 (0.50) | 0 |
| Pts6. I will retain blood and donor samples for at least 7 days as per specifications. | 188 (94.00) | 9 (4.50) | 2 (1.00) | 0 | 1 (0.50) |
| Pts7. I will conduct post-transfusion efficacy assessments for patients, analyzing vital sign changes and other post-transfusion observations. | 163 (81.50) | 21 (10.50) | 12 (6.00) | 2 (1.00) | 2 (1.00) |
| Pts8. Upon receiving reports of transfusion reactions, I will promptly handle and complete relevant tests. | 179 (89.50) | 18 (9.00) | 2 (1.00) | 0 | 1 (0.50) |
| Pts9. I will regularly compile statistics on cases of adverse transfusion reactions and report them uniformly to the hospital. | 169 (84.50) | 20 (10.00) | 7 (3.50) | 3 (1.50) | 1 (0.50) |
| Pts10. I consistently update my professional knowledge and skills related to blood transfusion therapy. | 185 (92.50) | 13 (6.50) | 1 (0.50) | 0 | 1 (0.50) |

Out of 219 cases of transfusion specialist doctors, 19 doctors selected this section instead of the doctor category; therefore, they did not fill out the corresponding practice section questions.
